# Supplementary material
Source: PubMed Central journal article supplement (PMC2475330)
Supplement: embor200883-s1.pdf [file embor200883-s1.pdf]

## Supplementary Figure S1

**Effect of *dasR* deletion on antibiotic production in *S. coelicolor*.** Enhanced production of pigmented antibiotics in a *dasR* mutant (BAP29, left part of the plates) compared to the parental *S. coelicolor* M145 (right part of the plates) on minimal medium with several nonrepressing carbon sources (allowing morphological differentiation of both strains). Note that *reduced* antibiotic production by BAP29 is observed on the R2YE plate, which does not allow development of BAP29.

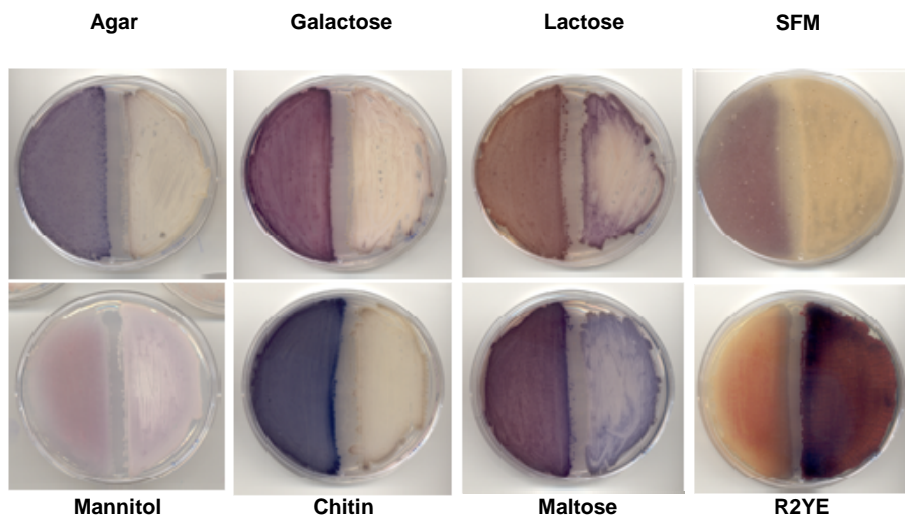

## Supplementary Table S1.

Construction of the DasR binding site position weight matrix for the prediction of DasR-responsive elements (for details see Hiard *et al.*, *Biochem Biophys Res Commun* 357, 861-864 (2007)).

**A Multiple Alignment**

| Genes            | 1 | 2 | 3 | 4 | 5 | 6 | 7 | 8 | 9 | 10 | 11 | 12 | 13 | 14 | 15 | 16 | Scores |
|------------------|---|---|---|---|---|---|---|---|---|----|----|----|----|----|----|----|--------|
| <i>crr-ptsI</i>  | T | G | T | G | G | T | C | T | A | G  | A  | C  | C  | T  | C  | T  | 15.55  |
| <i>malX2</i>     | A | C | T | G | G | T | G | T | A | G  | A  | C  | C  | A  | G  | T  | 17.88  |
| <i>nagE2</i> (1) | A | C | A | G | G | T | C | T | A | C  | A  | C  | C  | A  | C  | T  | 16.47  |
| <i>nagE2</i> (2) | A | G | T | G | G | T | G | T | A | G  | A  | C  | C  | A  | C  | C  | 16.03  |
| <i>ptsH</i> (1)  | A | C | T | G | G | T | C | T | A | G  | A  | C  | A  | A  | C  | T  | 19.55  |
| <i>ptsH</i> (2)  | A | C | T | G | G | T | C | T | A | G  | A  | C  | A  | A  | G  | A  | 18.07  |
| <i>nagB</i>      | A | T | T | G | G | T | C | T | A | A  | A  | C  | C  | A  | C  | A  | 17.87  |
| Consensus        | A | C | T | G | G | T | C | T | A | G  | A  | C  | C  | A  | C  | T  | 19.52  |

(1) and (2) are for the first and second *dres*. Scores are in unit of bit.

**B Alignment Matrix**

| positions | 1 | 2 | 3 | 4 | 5 | 6 | 7 | 8 | 9 | 10 | 11 | 12 | 13 | 14 | 15 | 16 |
|-----------|---|---|---|---|---|---|---|---|---|----|----|----|----|----|----|----|
| <b>A</b>  | 6 | 0 | 1 | 0 | 0 | 0 | 0 | 0 | 7 | 1  | 7  | 0  | 2  | 6  | 0  | 2  |
| <b>C</b>  | 0 | 4 | 0 | 0 | 0 | 0 | 5 | 0 | 0 | 1  | 0  | 7  | 5  | 0  | 5  | 1  |
| <b>G</b>  | 0 | 2 | 0 | 7 | 7 | 0 | 2 | 0 | 0 | 5  | 0  | 0  | 0  | 0  | 2  | 0  |
| <b>T</b>  | 1 | 1 | 6 | 0 | 0 | 7 | 0 | 7 | 0 | 0  | 0  | 0  | 0  | 1  | 0  | 4  |

Each line displays the number of occurrence of the given nucleotide at the 16 different positions. Numbers enclosed in boxes indicate the number of occurrence of nucleotides that constitute the consensus sequence.

**C Weight Matrix**  
(Maximum score: 19.55 bits ; Minimun score: -33.28 bits)

| positions | 1     | 2     | 3     | 4     | 5     | 6     | 7     | 8     | 9     | 10    | 11    | 12    | 13    | 14    | 15    | 16    |
|-----------|-------|-------|-------|-------|-------|-------|-------|-------|-------|-------|-------|-------|-------|-------|-------|-------|
| <b>A</b>  | 1.70  | -2.08 | 0.02  | -2.08 | -2.08 | -2.08 | -2.08 | -2.08 | 1.85  | 0.20  | 1.85  | -2.08 | 0.65  | 1.7   | -2.08 | 0.65  |
| <b>C</b>  | -2.08 | 0.41  | -2.08 | -2.08 | -2.08 | -2.08 | 0.62  | -2.08 | -2.08 | -0.75 | -2.08 | 0.94  | 0.62  | -2.08 | 0.62  | -0.75 |
| <b>G</b>  | -2.08 | -0.20 | -2.08 | 0.94  | 0.94  | -2.08 | -0.20 | -2.08 | -2.08 | 0.62  | -2.08 | -2.08 | -2.08 | -2.08 | -0.20 | -2.08 |
| <b>T</b>  | 0.02  | 0.02  | 1.70  | -2.08 | -2.08 | 1.85  | -2.08 | 1.85  | -2.08 | -2.08 | -2.08 | -2.08 | -2.08 | 0.02  | -2.08 | 1.31  |

Each line displays the weight of the given nucleotide at the 16 different positions. Scores are in unit of bit. Values enclosed in boxes indicate the scores of nucleotides that constitute the consensus sequence.

## Supplementary Table S2. Computational prediction of the DasR regulon of *Streptomyces coelicolor*

Numbers highlighted in yellow indicates genes validated experimentally (*in vitro* and/or *in vivo*) as part of the DasR regulon of *Streptomyces coelicolor*. The prediction has been performed with PREDetector using the position weight matrix shown in supplemental Table S1.

| #  | GENE ID                | FUNCTION                                                   | <i>dre</i>                                                 | POSITION             | SCORE                  | CO-TRANSC GENE(S)                                                      | CO-TRANSC FUNCTION(S)                                                                                                                            |
|----|------------------------|------------------------------------------------------------|------------------------------------------------------------|----------------------|------------------------|------------------------------------------------------------------------|--------------------------------------------------------------------------------------------------------------------------------------------------|
| 1  | SCO5841c, <i>ptsH</i>  | PTS phosphocarrier protein HPr                             | agttgtctagaccagt                                           | -51                  | 19.55                  | -                                                                      | -                                                                                                                                                |
|    | SCO5842                | conserved hypothetical protein SC9B10.09                   | tcttgtctagaccagt                                           | -168                 |                        |                                                                        |                                                                                                                                                  |
| 2  | SCO2905c, <i>malX2</i> | PTS <sup>GlcNAc</sup> EIIB component                       |                                                            | -134                 | 17.88                  | SCO2904c, <i>rph</i>                                                   | putative ribonuclease PH                                                                                                                         |
|    | SCO2906, <i>nagE1</i>  | putative PTS transmembrane component                       | actgggtctacaccagt                                          | -41                  |                        | -                                                                      | -                                                                                                                                                |
| 3  | SCO5236c, <i>nagB</i>  | Glucosamine-6-phosphate isomerase                          | tgtggtttagaccaat                                           | -68                  | 17.87                  | -                                                                      | -                                                                                                                                                |
| 4  | SCO1390, <i>crr</i>    | putative PTS system sugar phosphotransferase component IIA | tgtgggtctagacctct                                          | -130                 | 16.57                  | SCO1391, <i>ptsI</i>                                                   | phosphoenolpyruvate-protein phosphotransferase                                                                                                   |
| 5  | SCO2907, <i>nagE2</i>  | PTS <sup>GlcNAc</sup> EIIC component                       | acagggtctacaccact                                          | -49                  | 16.47                  | -                                                                      | -                                                                                                                                                |
|    |                        |                                                            | agtgggtgtagaccacc                                          | -32                  | 16.03                  |                                                                        |                                                                                                                                                  |
|    |                        |                                                            | caagggtgtagacctct                                          | -236                 | 9.07                   |                                                                        |                                                                                                                                                  |
| 6  | SCO7056c               | GntR-family transcriptional regulator                      | attgggtctaaaccagc                                          | -79                  | 15.65                  | -                                                                      | -                                                                                                                                                |
| 7  | SCO5232, <i>dasA</i>   | Chitobiose ABC transporter, sugar binding protein          | actgggtctacaccatt<br>cttgggtctagtcata                      | -106<br>-322         | 15.45<br>8.06          | SCO5233,<br><i>dasB</i> /SCO5234,<br><i>dasC</i> /SCO5235, <i>dasD</i> | chitobiose transporter integral membrane protein/chitobiose transporter integral membrane protein/intracellular $\beta$ -N-acetylglucosaminidase |
| 8  | SCO7224c               | putative integral membrane protein                         | ccttgtctagaccaat<br>tcagggtctagacctgt<br>tatgggtctagacctga | -159<br>-293<br>-272 | 14.95<br>14.68<br>12.8 | -                                                                      | -                                                                                                                                                |
|    | SCO7225                | secreted chitin-binding protein                            |                                                            | -168<br>-34<br>-55   |                        |                                                                        |                                                                                                                                                  |
| 9  | SCO3679                | hypothetical protein                                       | tgttgtctagtccaat                                           | -314                 | 14.57                  | -                                                                      | -                                                                                                                                                |
| 10 | SCO3563, <i>acsA</i>   | acetyl-coenzyme A synthetase                               | acagggtctaaaccatt                                          | -102                 | 14.54                  | -                                                                      | -                                                                                                                                                |
| 11 | SCO1433                | hypothetical protein SC6D7.06c.                            |                                                            | -205                 | 14.38                  | -                                                                      | -                                                                                                                                                |
|    | SCO1432c               | putative membrane protein.                                 | attgggtgtcgaccact                                          | -86                  |                        |                                                                        |                                                                                                                                                  |
| 12 | SCO5239                | histidine kinase                                           | agtgggtctagtcacaca                                         | -335                 | 14.32                  | -                                                                      | -                                                                                                                                                |
| 13 | SCO6300c               | secreted $\beta$ -N-acetylglucosaminidase                  | atagggtctagacaaaa                                          | -131                 | 14.12                  | -                                                                      | -                                                                                                                                                |
|    |                        |                                                            | agagggtctagacaaaa                                          | -116                 | 13.9                   |                                                                        |                                                                                                                                                  |

|    |                       |                                                             |                                                      |                  |               |                                               |                                                                                                                 |
|----|-----------------------|-------------------------------------------------------------|------------------------------------------------------|------------------|---------------|-----------------------------------------------|-----------------------------------------------------------------------------------------------------------------|
| 14 | SCO1444               | putative chitinase precursor                                | actggtctagtcctct<br>attggtccataacctat                | -53<br>-75       | 13.91<br>8.12 | -                                             | -                                                                                                               |
| 15 | SCO4286               | putative solute-binding protein (putative secreted protein) | agaggtctagtcacct                                     | -81<br>-63       | 13.3          | SCO4287                                       | hypothetical protein SCD95A.20                                                                                  |
|    | SCO4285c, <i>nagK</i> | N-acetylglucosamine kinase                                  | ggtggtgtagacctta                                     | -83<br>-101      | 10.24         | SCO4284c, <i>nagA</i>                         | N-acetylglucosamine-6-phosphate deacetylase                                                                     |
| 16 | SCO5003c, <i>chiA</i> | chitinase A (family 18-B)                                   | ggtggtccagaccaat                                     | -77              | 13.14         | -                                             | -                                                                                                               |
|    | SCO5004               | hypothetical protein SCK15.06                               |                                                      | -258             |               | -                                             | -                                                                                                               |
| 17 | SCO4442               | hypothetical protein SCD6.20                                | attggcgtaaaccaca                                     | -41              | 13.12         | -                                             | -                                                                                                               |
| 18 | SCO6486, <i>dppA</i>  | D-ala-D-ala aminopeptidase                                  | agtgggtccagaccacc                                    | -71              | 12.92         | SCO6487/SCO6488/SCO6489/SCO6490               | putative aminoacylase/putative acyl-peptide hydrolase/conserved hypothetical protein/putative acetyltransferase |
| 19 | SCO4315               | putative homeostasis protein                                | attggactagacctgt                                     | -39              | 12.7          | -                                             | -                                                                                                               |
| 20 | SCO2672               | putative membrane protein                                   | agaggtctggacaaca                                     | -32              | 12.67         | -                                             | -                                                                                                               |
| 21 | SCO1429, <i>chiD</i>  | chitinase D (family 18-A)                                   | actggtctagtcctcc                                     | -96              | 11.85         | -                                             | -                                                                                                               |
|    | SCO1428c              | acyl-CoA dehydrogenase                                      |                                                      | -312             |               | -                                             | -                                                                                                               |
| 22 | SCO5673, <i>chiB</i>  | Chitinase B (family 18-B)                                   | attggtctggacccaaa                                    | -63              | 11.84         | -                                             | -                                                                                                               |
| 23 | SCO7250c              | N-acetylmuramoyl-L-alanine amidase                          | agtggcgtagacctgt                                     | -213             | 11.72         | -                                             | -                                                                                                               |
| 24 | SCO7263, <i>chiF</i>  | Chitinase F (family 19)                                     | actggtctacaccctt<br>actggtacagacccaaa                | -172<br>-155     | 11.67<br>10.0 | SCO7264                                       | putative oxidoreductase                                                                                         |
| 25 | SCO6013               | probable 1-deoxyxylulose-5-phosphate synthase               | aatggtctggaccaga                                     | -274<br>-258     | 11.62         | -                                             | -                                                                                                               |
|    | SCO6012c, <i>chiH</i> | Chitinase H (family 18-C)                                   | atgggactagaccaat                                     | -111<br>-127     | 8.72          | -                                             | -                                                                                                               |
| 26 | SCO5580               | putative prokaryotic docking protein                        | tttgggtggaaaccaca                                    | -37              | 11.44         | -                                             | -                                                                                                               |
|    | SCO5579c              | putative transmembrane protein                              |                                                      | -134             |               | -                                             | -                                                                                                               |
| 27 | SCO6004c              | putative secreted ATP/GTP binding protein                   | agtggactataacctgt                                    | -244             | 11.21         | -                                             | -                                                                                                               |
|    | SCO6005, <i>ngcE</i>  | NgcE, putative GlcNAc/chitobiose ABC transporter            |                                                      | -334             |               | SCO6006,<br><i>ngcF</i> /SCO6007, <i>ngcG</i> | ABC transmembrane transport protein/ABC transmembrane transport protein                                         |
| 28 | SCO4393c              | conserved hypothetical protein                              | tgcggtctggaccagt                                     | -55              | 11.15         | -                                             | -                                                                                                               |
|    | SCO4394               | iron repressor                                              |                                                      | -184             |               | -                                             | -                                                                                                               |
| 29 | SCO5376c, <i>chiC</i> | chitinase C (family 18-A)                                   | ataggtctggaccaat<br>aaaggtctggaccata                 | -109<br>-88      | 10.82<br>8.06 | -                                             | -                                                                                                               |
|    | 30                    | SCO2946c                                                    | Putative ABC sugar transporter sugar-binding protein | agaggtctgaaccaat | -112          | 10.82                                         | SCO2945c/SCO2944c/S<br>CO2943c                                                                                  |
| 31 | SCO2833c, <i>chb</i>  | secreted chitin binding protein.                            | gcaggtctagaccaag<br>acatgtccataccaaa                 | -70<br>-110      | 10.79<br>8.35 | -                                             | -                                                                                                               |
| 32 | SCO2503, <i>chiJ</i>  | Chitinase J (family 18-B)                                   | aaaggtctggaccaca<br>cttgggtccagacctct                | -78<br>-99       | 10.76<br>9.74 | -                                             | -                                                                                                               |

|    |                       |                                                                    |                    |      |       |                                         |                                                                                                                                                                              |
|----|-----------------------|--------------------------------------------------------------------|--------------------|------|-------|-----------------------------------------|------------------------------------------------------------------------------------------------------------------------------------------------------------------------------|
| 33 | SCO5716c              | putative peptide transport system secreted peptide binding protein | attggcgcagaccact   | -197 | 10.45 | SCO5715c/SCO5714c/S<br>CO5713c/SCO5712c | putative peptide transport system permease/putative peptide transport permease/putative peptide transport ATP-binding protein/putative peptide transport ATP-binding protein |
| 34 | SCO4506               | conserved hypothetical protein                                     | agaggtcaagatcact   | -103 | 10.28 | SCO4507                                 | putative serine/threonine protein kinase                                                                                                                                     |
|    | SCO4505c              | cold shock protein                                                 |                    | -206 |       |                                         |                                                                                                                                                                              |
| 35 | SCO1117c              | putative secreted protein                                          | cgcggctctagacccaaa | -131 | 10.28 | -                                       | -                                                                                                                                                                            |
| 36 | SCO5881c, <i>redZ</i> | Red cluster pathway-specific activator (via <i>redD</i> )          | agtgggtttccacctca  | -201 | 10.2  | -                                       | -                                                                                                                                                                            |
| 37 | SCO4841c              | putative short-chain dehydrogenase                                 | actgctccagacatgt   | -3   | 10.1  | -                                       | -                                                                                                                                                                            |
| 38 | SCO6149               | putative ATP GTP-binding protein                                   | ggaggtgtcgaccaat   | -140 | 10.09 | SCO6150/SCO6151                         | putative ADA-like regulatory protein/putative methylated-DNA-protein-cysteine methyltransferase                                                                              |
| 39 | SCO4671c              | putative lysR-family regulatory protein                            | gctggtagacagaccagt | -55  | 10.01 | -                                       | -                                                                                                                                                                            |
| 40 | SCO0764c              | putative hydrolase                                                 | attgggtgtgtacctct  | -80  | 10.0  | -                                       | -                                                                                                                                                                            |
| 41 | SCO4240c, <i>msiK</i> | ABC transporter ATP-binding protein                                | ggtgggtgtagtccaca  | -75  | 9.87  | -                                       | -                                                                                                                                                                            |
| 42 | SCO2753               | putative LacI-family transcriptional regulator.                    |                    | -120 | 9.75  | SCO2751c/SCO2750c                       | conserved hypothetical protein<br>SCC57A.22c./conserved hypothetical protein<br>SCC57A.21c.                                                                                  |
|    | SCO2752c              | putative oxidoreductase                                            | ggtgggtctggacaaga  | -127 |       |                                         |                                                                                                                                                                              |
| 43 | SCO7591c              | putative regulatory protein                                        | tgtgctgttcaccagt   | -5   | 9.72  | SCO7593                                 | hypothetical protein SC7H9.05                                                                                                                                                |
|    | SCO7592               | conserved hypothetical protein                                     |                    | -124 |       |                                         |                                                                                                                                                                              |
| 44 | SCO2655c              | conserved hypothetical protein SC8E4A.25c                          | agtgttttcgaccaca   | -124 | 9.68  | -                                       | -                                                                                                                                                                            |
|    | SCO2656               | putative membrane protein                                          |                    | -110 |       |                                         |                                                                                                                                                                              |
| 45 | SCO2549c              | possible protease                                                  | agaggtttggatcact   | -45  | 9.68  | -                                       | -                                                                                                                                                                            |
| 46 | SCO3975c              | putative regulator                                                 | tgtggctcgagaccgga  | -86  | 9.47  | -                                       | -                                                                                                                                                                            |
| 47 | SCO2221               | conserved hypothetical protein SC10B7.16                           | actggcgtcaacaagt   | -64  | 9.45  | SCO2222                                 | putative iron-sulfur oxidoreductase (putative secreted protein)                                                                                                              |
| 48 | SCO4107               | putative integral membrane protein                                 | agtgggtgaacacaacg  | -133 | 9.43  | -                                       | -                                                                                                                                                                            |
| 49 | SCO7587               | putative integral membrane protein                                 | acaagtgaagaccaca   | -4   | 9.41  | -                                       | -                                                                                                                                                                            |
| 50 | SCO5012               | putative integral membrane protein                                 | acaggagaagacaact   | -242 | 9.19  | SCO5013/SCO5014/SC<br>O5015             | putative secreted protein/putative secreted protein/putative secreted protein                                                                                                |
| 51 | SCO4646               | preprotein translocase SecE subunit                                | actgggtctccaaaacc  | -156 | 9.17  | SCO4647                                 | transcription antitermination protein                                                                                                                                        |
|    | SCO4645c              | aspartate aminotransferase                                         |                    | -281 |       |                                         |                                                                                                                                                                              |
| 52 | SCO1906c              | putative secreted protein                                          | actggcggagacctct   | -128 | 9.16  | -                                       | -                                                                                                                                                                            |
| 53 | SCO6345               | Chitin-binding protein                                             | gtaggtctagacctgc   | -94  | 9.11  | -                                       | -                                                                                                                                                                            |
|    |                       |                                                                    | taaggtctagacctgc   | -114 |       |                                         |                                                                                                                                                                              |
|    | SCO6344c              | putative secreted amidase                                          |                    | -153 |       |                                         |                                                                                                                                                                              |
|    |                       |                                                                    |                    | -133 |       |                                         |                                                                                                                                                                              |
| 54 | SCO1262c              | putative gntR-family transcriptional regulator                     | cttgggtcaagaccaat  | -113 | 9.11  | -                                       | -                                                                                                                                                                            |
| 55 | SCO1226c              | Chitinase                                                          | cttgggtccagacctgt  | -188 | 8.92  | -                                       | -                                                                                                                                                                            |
| 56 | SCO6266               | ScbA protein                                                       | agtagttttgatcaat   | 12   | 8.88  | -                                       | -                                                                                                                                                                            |

|    |                      |                                                                     |                    |      |      |                                              |                                                                                                                                                                 |
|----|----------------------|---------------------------------------------------------------------|--------------------|------|------|----------------------------------------------|-----------------------------------------------------------------------------------------------------------------------------------------------------------------|
| 57 | SCO0528              | putative lipoprotein                                                | agtggctctagctatga  | -45  | 8.83 | -                                            | -                                                                                                                                                               |
|    | SCO0527c             | cold shock protein                                                  |                    | -302 |      | -                                            | -                                                                                                                                                               |
| 58 | SCO7815              | putative TetR-family transcriptional regulator                      | agtggctctcgatcgggt | -346 | 8.79 | -                                            | -                                                                                                                                                               |
| 59 | SCO7726              | putative hydrolase                                                  | cgtggctcgagacgaat  | -327 | 8.79 | -                                            | -                                                                                                                                                               |
| 60 | SCO7069c             | chitinase                                                           | acaggtccgaccaat    | -61  | 8.77 | -                                            | -                                                                                                                                                               |
|    | SCO7070              | chitosanase                                                         |                    | -50  |      | -                                            | -                                                                                                                                                               |
| 61 | SCO5954, <i>chiE</i> | chitinase E (family 18-A)                                           | attgggtccagaccttc  | -95  | 8.76 | -                                            | -                                                                                                                                                               |
|    |                      |                                                                     | acagggcgcagaccacc  | 8    | 7.1  | -                                            | -                                                                                                                                                               |
| 62 | SCO6033              | hypothetical protein SC1C3.21                                       | cttggctctagtccatt  | -278 | 8.72 | -                                            | -                                                                                                                                                               |
|    | SCO6032c             | $\beta$ -Nacetylglucosaminidase                                     |                    | -154 |      | -                                            | -                                                                                                                                                               |
| 63 | SCO5261              | putative malate oxidoreductase                                      | ggttctttacaccct    | -162 | 8.66 | -                                            | -                                                                                                                                                               |
| 64 | SCO6231c             | probable sugar transport system sugar-binding lipoprotein SC2H4.13c | tcaggactagaccggt   | -202 | 8.65 | SCO6230c/SCO6229c                            | putative sugar transport system permease protein/putative sugar transport system permease protein                                                               |
|    | SCO6232              | putative beta-mannosidase                                           |                    | -86  |      | SCO6233                                      | putative transcriptional regulator                                                                                                                              |
| 65 | SCO5230c             | putative integral membrane protein                                  | tctggctctagtccctgg | -118 | 8.65 | SCO5229c/SCO5228c/SCO5227c/SCO5226c/SCO5225c | putative permease/putative acetyltransferase/putative redoxin/ribonucleotide-diphosphate reductase large chain/ribonucleotide-diphosphate reductase small chain |
| 66 | SCO1634c             | putative small membrane protein                                     | tgatgtcgagactaga   | -16  | 8.58 | -                                            | -                                                                                                                                                               |
| 67 | SCO5430c             | putative extracellular solute-binding lipoprotein                   | aatggctctagtcagggt | -81  | 8.53 | SCO5429c/SCO5428c                            | putative integral membrane transport protein/putative integral membrane transport protein                                                                       |
| 68 | SCO6319              | putative lipoprotein                                                | attggctctgaaccatg  | -30  | 8.51 | -                                            | -                                                                                                                                                               |
| 69 | SCO3490              | transposase                                                         | aatcgtcaagacctgt   | -118 | 8.51 | -                                            | -                                                                                                                                                               |
| 70 | SCO2529              | putative metalloprotease.                                           | agtgcggtataccact   | -120 | 8.44 | SCO2530/SCO2531                              | hypothetical protein SCC117.03./putative beta-glucosidase.                                                                                                      |
|    | SCO2528c             | 2-isopropylmalate synthase                                          |                    | -259 |      | -                                            | -                                                                                                                                                               |
| 71 | SCO5819              | sporulation transcription factor, WhiH                              | tgtgcttttcacccaaa  | -55  | 8.42 | -                                            | -                                                                                                                                                               |
| 72 | SCO3131c             | conserved hypothetical protein                                      | cgtggctcgagaccggt  | 6    | 8.42 | -                                            | -                                                                                                                                                               |
| 73 | SCO2119c             | 6-phosphofruktokinase                                               | ggtggttgaggccact   | -40  | 8.39 | SCO2118c                                     | putative D-lactate dehydrogenase                                                                                                                                |
| 74 | SCO1798c             | putative ABC transporter ATP-binding subunit                        | tgtcgcgtacacctgt   | -56  | 8.36 | SCO1797c                                     | putative integral membrane protein                                                                                                                              |
|    | SCO1799              | hypothetical protein                                                |                    | -114 |      | -                                            | -                                                                                                                                                               |
| 75 | SCO2426              | possible regulatory protein                                         | agagatgtacaacaca   | -144 | 8.34 | -                                            | -                                                                                                                                                               |
| 76 | SCO5366              | ATP synthase protein I                                              | agaggtaaagacctca   | -172 | 8.26 | -                                            | -                                                                                                                                                               |
| 77 | SCO2835c             | putative membrane protein.                                          | agttggttagagcagc   | -227 | 8.22 | SCO2834c                                     | putative membrane protein                                                                                                                                       |
| 78 | SCO1953c             | ABC excision nuclease subunit C                                     | ggatgtgaagacctct   | -268 | 8.22 | SCO1952c/SCO1951c/SCO1950c/SCO1949c/SCO1948c | conserved hypothetical protein/conserved hypothetical protein/hypothetical protein/small hypothetical protein/putative zinc-binding carboxypeptidase            |
|    | SCO1954              | hypothetical protein                                                |                    | -101 |      | -                                            | -                                                                                                                                                               |
| 79 | SCO4722              | preprotein translocase SecY subunit                                 | gctcgtctgaaccact   | -266 | 8.19 | SCO4723                                      | adenylate kinase                                                                                                                                                |

|     |                         |                                                |                    |      |      |                                                                                         |                                                                                                                                                                                                                                                                                                                                       |
|-----|-------------------------|------------------------------------------------|--------------------|------|------|-----------------------------------------------------------------------------------------|---------------------------------------------------------------------------------------------------------------------------------------------------------------------------------------------------------------------------------------------------------------------------------------------------------------------------------------|
| 80  | SCO3366c                | putative exporter                              | agttgtctactactggg  | -72  | 8.15 | -                                                                                       | -                                                                                                                                                                                                                                                                                                                                     |
|     | SCO3367                 | putative tetR-family regulator                 |                    | -103 |      | -                                                                                       | -                                                                                                                                                                                                                                                                                                                                     |
| 81  | SCO6755                 | putative transferase                           | tctgggtgaacaccagg  | 33   | 8.14 | SCO6756                                                                                 | putative glycosyltransferase                                                                                                                                                                                                                                                                                                          |
| 82  | SCO2978                 | putative secreted protein                      | cctggcgctacaccaga  | -67  | 8.14 | SCO2979/SCO2980                                                                         | putative integral membrane transport protein/putative integral membrane transport protein                                                                                                                                                                                                                                             |
| 83  | SCO2261c                | putative membrane protein.                     | actggtagaccgaccagt | 17   | 8.14 | -                                                                                       | -                                                                                                                                                                                                                                                                                                                                     |
| 84  | SCO7477                 | putative membrane protein                      | ataggttagagaccaat  | -187 | 8.12 | -                                                                                       | -                                                                                                                                                                                                                                                                                                                                     |
|     | SCO7476c                | putative secreted protein                      |                    | -86  |      | -                                                                                       | -                                                                                                                                                                                                                                                                                                                                     |
| 85  | SCO0915                 | hypothetical protein SCM10.03                  | tttgggtatggaccatt  | -98  | 8.12 | -                                                                                       | -                                                                                                                                                                                                                                                                                                                                     |
|     | SCO0914c                | putative lipoprotein                           |                    | -127 |      | -                                                                                       | -                                                                                                                                                                                                                                                                                                                                     |
| 86  | SCO7628                 | conserved hypothetical protein                 | attgggtctgggcctga  | -146 | 8.11 | SCO7629/SCO7630                                                                         | probable starvation sensing protein/putative isomerase                                                                                                                                                                                                                                                                                |
| 87  | SCO5231c, <i>dasR</i>   | DasR, GlcNAc regulon transcriptional regulator | cttgggtctagtcata   | -150 | 8.06 | -                                                                                       | -                                                                                                                                                                                                                                                                                                                                     |
| 88  | SCO0481, <i>chb3</i>    | secreted chitin binding protein                | tatgggtctagtcacaac | -201 | 8.06 | -                                                                                       | -                                                                                                                                                                                                                                                                                                                                     |
| 89  | SCO1211c                | putative polypeptide deformylase               | tgaggtccacaccacg   | -5   | 8.04 | -                                                                                       | -                                                                                                                                                                                                                                                                                                                                     |
|     | SCO1212                 | putative ligase                                |                    | -76  |      | SCO1213                                                                                 | conserved hypothetical protein                                                                                                                                                                                                                                                                                                        |
| 90  | SCO5085, <i>actII-4</i> | actinorhodin cluster activator protein         | tgttgagtaggctgt    | -59  | 7.98 | -                                                                                       | -                                                                                                                                                                                                                                                                                                                                     |
| 91  | SCO4526                 | putative protein kinase                        | accgctgtcgaccact   | 4    | 7.97 | SCO4527/SCO4528/SCO4529/SCO4530/SCO4531/SCO4532/SCO4533/SCO4534/SCO4535/SCO4536/SCO4537 | putative integral membrane protein/putative integral membrane protein/putative membrane protein/putative septum determining protein/putative membrane protein/hypothetical protein/putative membrane protein/putative integral membrane protein/hypothetical protein/putative integral membrane protein/hypothetical protein 2SCD4.08 |
| 92  | SCO4516c                | hypothetical protein SCD35.23c                 | actgggtctggatccgt  | -20  | 7.97 | SCO4515c/SCO4514c/SCO4513c/SCO4512c/SCO4511c/SCO4510c                                   | putative membrane protein/putative integral membrane protein/hypothetical protein SCD35.20c/hypothetical protein SCD35.19c/putative integral membrane protein/hypothetical protein SCD35.17                                                                                                                                           |
| 93  | SCO1648, <i>arc</i>     | AAA ATPase                                     | agtgttcaaacaccgct  | -196 | 7.97 | -                                                                                       | -                                                                                                                                                                                                                                                                                                                                     |
|     | SCO1649                 | putative ferredoxin                            |                    | -66  |      | -                                                                                       | -                                                                                                                                                                                                                                                                                                                                     |
| 94  | SCO5609c                | hypothetical protein SC2E1.26c                 | actggctcaggaccgct  | -133 | 7.88 | -                                                                                       | -                                                                                                                                                                                                                                                                                                                                     |
| 95  | SCO2438                 | putative secreted protein                      | tgtcgcgttagagcagt  | 2    | 7.84 | -                                                                                       | -                                                                                                                                                                                                                                                                                                                                     |
| 96  | SCO3091c                | cyclopropane-fatty-acyl-phospholipid synthase  | atagctgtacacacca   | -115 | 7.83 | -                                                                                       | -                                                                                                                                                                                                                                                                                                                                     |
| 97  | SCO0409c, <i>sapA</i>   | spore-associated protein precursor             | agatgtttacgactgt   | -125 | 7.82 | -                                                                                       | -                                                                                                                                                                                                                                                                                                                                     |
| 98  | SCO4394, <i>desR</i>    | iron repressor                                 | actgatcgacaccacg   | 9    | 7.81 | -                                                                                       | -                                                                                                                                                                                                                                                                                                                                     |
| 99  | SCO7458                 | putative membrane protein.                     | tgatctgttagacgaaa  | 2    | 7.73 | -                                                                                       | -                                                                                                                                                                                                                                                                                                                                     |
| 100 | SCO7784                 | putative oxidoreductase                        | aggggtgtcgacgact   | -337 | 7.68 | SCO7785                                                                                 | putative transcriptional regulator                                                                                                                                                                                                                                                                                                    |
| 101 | SCO4735                 | 30S ribosomal protein S9                       | cgtggccgagaccact   | -1   | 7.66 | -                                                                                       | -                                                                                                                                                                                                                                                                                                                                     |
| 102 | SCO1600c                | putative translation initiation factor IF-3    | tgttcgttagacctaa   | -72  | 7.59 | -                                                                                       | -                                                                                                                                                                                                                                                                                                                                     |
|     | SCO1601                 | hypothetical protein SCI35.23                  |                    | -328 |      | -                                                                                       | -                                                                                                                                                                                                                                                                                                                                     |
| 103 | SCO7053c                | hypothetical protein                           | tgtggagtagagtagt   | -50  | 7.52 | -                                                                                       | -                                                                                                                                                                                                                                                                                                                                     |
|     | SCO7054                 | conserved hypothetical protein                 |                    | -47  |      | SCO7055                                                                                 | putative methyltransferase                                                                                                                                                                                                                                                                                                            |
| 104 | SCO0790                 | putative hydrolase                             | cctcgtcgacaccaat   | 36   | 7.47 | -                                                                                       | -                                                                                                                                                                                                                                                                                                                                     |

|     |                      |                                                     |                   |      |      |                                                         |                                                                                                                                                                                                                 |
|-----|----------------------|-----------------------------------------------------|-------------------|------|------|---------------------------------------------------------|-----------------------------------------------------------------------------------------------------------------------------------------------------------------------------------------------------------------|
| 105 | SCO4635, rpmG        | 50S ribosomal protein L33                           | agcgggtgtagctcagt | -164 | 7.42 | SCO4636/SCO4637                                         | hypothetical protein SCD82.07/conserved hypothetical protein                                                                                                                                                    |
| 106 | SCO0072c             | putative secreted protein                           | ccaggttcagacctgt  | -309 | 7.42 | -                                                       | -                                                                                                                                                                                                               |
|     | SCO0073              | hypothetical protein                                |                   | -219 |      | SCO0074/SCO0075                                         | hypothetical protein/hypothetical protein                                                                                                                                                                       |
| 107 | SCO2024              | putative chitosanase (putative secreted protein)    | agaggtgtccccaat   | -14  | 7.4  | -                                                       | -                                                                                                                                                                                                               |
| 108 | SCO6445              | putative inositol monophosphatase                   | acgcgtgtacacctga  | -88  | 7.37 | SCO6446                                                 | hypothetical protein SC9B5.13                                                                                                                                                                                   |
| 109 | SCO4689              | hypothetical protein SCD31.14                       | gcatgtctacatcagc  | -145 | 7.37 | SCO4690/SCO4691/SCO4692/SCO4693/SCO4694/SCO4695/SCO4696 | putative membrane protein/putative membrane protein/conserved hypothetical protein SCD31.17/putative membrane protein/hypothetical protein SCD31.19/hypothetical protein SCD31.20/hypothetical protein SCD31.21 |
| 110 | SCO6021              | conserved hypothetical protein SC1C3.09             |                   | -227 | 7.34 | SCO6022/SCO6023/SCO6024/SCO6025                         | hypothetical protein SC1C3.10/conserved hypothetical protein SC1C3.11/putative transferase/hypothetical protein                                                                                                 |
|     | SCO6020c             | putative transcriptional regulator                  | actgctgttgacagca  | -233 |      | -                                                       | -                                                                                                                                                                                                               |
| 111 | SCO5329              | hypothetical protein                                | tgtggttgagacctca  | -183 | 7.34 | -                                                       | -                                                                                                                                                                                                               |
| 112 | SCO4062              | putative transposase                                | tgacgtctcaaccaca  | -32  | 7.34 | -                                                       | -                                                                                                                                                                                                               |
|     | SCO4061c             | hypothetical protein 2SCD60.27c                     |                   | -2   |      | -                                                       | -                                                                                                                                                                                                               |
| 113 | SCO3905c             | putative membrane protein                           |                   | -40  | 7.34 | -                                                       | -                                                                                                                                                                                                               |
|     | SCO3906, <i>rpsF</i> | putative 30S ribosomal protein S6                   | tgtgttttagccctca  | -252 |      | SCO3907.ssb /SCO3908, rpsR/SCO3909, rplI                | putative single-strand DNA-binding protein/putative 30S ribosomal protein S18/50S ribosomal protein L9                                                                                                          |
| 114 | SCO6593c             | hypothetical protein                                | agtgcctctatagaagc | -146 | 7.32 | SCO6592c                                                | -putative secreted protein                                                                                                                                                                                      |
| 115 | SCO7070              | hypothetical protein SC4G1.36                       | acaggtccggaccaat  | -50  | 7.28 | -                                                       | -                                                                                                                                                                                                               |
| 116 | SCO5046, <i>wblI</i> | hypothetical protein                                | tcaggagtagacctgt  | -14  | 7.28 | -                                                       | -                                                                                                                                                                                                               |
| 117 | SCO3914c             | putative transcriptional regulator                  |                   | -35  | 7.28 | SCO3913c                                                | conserved hypothetical protein                                                                                                                                                                                  |
|     | SCO3915              | putative transmembrane efflux protein               | agtggctgagaccagg  | -122 |      | -                                                       | -                                                                                                                                                                                                               |
| 118 | SCO3185              | putative Na <sup>+</sup> /H <sup>+</sup> antiporter |                   | -52  | 7.28 | -                                                       | -                                                                                                                                                                                                               |
|     | SCO3184c             | putative penicillin acylase (EC 3.5.1.11).          | accgggtgtacgcctca | -279 |      | -                                                       | -                                                                                                                                                                                                               |
| 119 | SCO5490c             | conserved hypothetical protein                      | agtggctcttcgtcact | -36  | 7.21 | SCO5489c                                                | hypothetical protein                                                                                                                                                                                            |
|     | SCO5491              | conserved hypothetical protein                      |                   | -63  |      | SCO5492                                                 | putative oxidoreductase                                                                                                                                                                                         |
| 120 | SCO6350c             | hypothetical protein SC3A7.18c                      | gcttgtgtcgacctat  | -1   | 7.2  | -                                                       | -                                                                                                                                                                                                               |
|     | SCO6351              | hypothetical protein SC3A7.19                       |                   | -95  |      | -                                                       | -                                                                                                                                                                                                               |
| 121 | SCO2920c             | putative secreted protease                          | acgcgtgtagtcaagt  | -91  | 7.18 | -                                                       | -                                                                                                                                                                                                               |
| 122 | SCO1006c             | hypothetical protein                                | tgtggccgacagcagt  | -197 | 7.16 | -                                                       | -                                                                                                                                                                                                               |
| 123 | SCO7290c             | putative dehydrogenase                              | acaggtgtaaacgggc  | -49  | 7.06 | SCO7289c                                                | putative regulator                                                                                                                                                                                              |
| 124 | SCO5330              | hypothetical protein SC6G9.03c                      | gctggcgtagcccact  | -54  | 7.06 | -                                                       | -                                                                                                                                                                                                               |
| 125 | SCO2787              | conserved hypothetical protein SCC105.18            |                   | -61  | 7.06 | SCO2788/SCO2789                                         | hypothetical protein SCC105.19/glucosamine-fructose-6-phosphate aminotransferase                                                                                                                                |
|     | SCO2786c             | beta-N-acetylhexosaminidase                         | acgggtgcggaccact  | -70  |      | -                                                       | -                                                                                                                                                                                                               |
| 126 | SCO5252              | conserved hypothetical protein                      | agtggccaacatgaga  | -27  | 7.05 | SCO5253                                                 | hypothetical protein 2SC7G11.15                                                                                                                                                                                 |
| 127 | SCO0021              | hypothetical protein                                | acttttctccccaggt  | 34   | 7.03 | -                                                       | -                                                                                                                                                                                                               |
| 128 | SCO7173              | putative transcriptional regulator                  | agaggtgtgcagcaga  | -110 | 7.02 | -                                                       | -                                                                                                                                                                                                               |



### Supplementary Table S3.

#### Oligonucleotides used in this work.

For doublestranded (ds) oligonucleotides used in electromobility shift assays (EMSAs) only the top strand oligo is given. Forward and reverse oligos are indicated with 'for' and 'rev', respectively. Predicted *dre* sites in bold face and italicized.

| Oligonucleotide          | Sequence (5' to 3')                                         | Position # |
|--------------------------|-------------------------------------------------------------|------------|
| <b>RT PCR</b>            |                                                             |            |
| <i>actII-4-RTfor</i>     | GCTGCAGACGTACGTGTACCACAC                                    | +185       |
| <i>actII-4-RTrev</i>     | GCGTCGATACGGAGCTGCATTCC                                     | +495       |
| <i>kasO-RTfor</i>        | GCGGGATGCTCAGTGAGCACGG                                      | +211       |
| <i>kasO-RTrev</i>        | GACGAGGTCGGCGAGGACGGG                                       | +440       |
| <i>redD-RTfor</i>        | TCATGGGAGTGCGGAGAACGCG                                      | +123       |
| <i>redD-RTrev</i>        | CGCCCCACAGTTCGTCCACCAG                                      | +384       |
| <i>redZ-RTfor</i>        | CGACATGAAAGTGCAGGTGG                                        | +74        |
| <i>redZ-RTrev</i>        | TCGGGCTTGGTCAGCAAAGC                                        | +241       |
| <i>rpsI-RTfor</i>        | GAGACCACTCCCGAGCAGCCGC                                      | +7         |
| <i>rpsI-RTrev</i>        | GTAGCGGTTGTCCAGCTCGAGCA                                     | +299       |
| <b>EMSAs (ds oligos)</b> |                                                             |            |
| <i>actII-4-dre</i>       | CACATTGAAATCT <b><i>GTTTGAGTAGGCCTGTT</i></b> TATTGTGCGCCCC | -71        |
| <i>crr-dre</i>           | CCGTGAGGAGT <b><i>GTGGTCTAGACCTCT</i></b> AATCGGAACA        | -140       |
| <i>redZ-dre</i>          | ACAAGATCTTCT <b><i>TGAGGTGGAAACCACT</i></b> TTCGTATCAGTCT   | -212       |
| <i>crp-cis</i>           | TGCGGCATCCTTGTGACAGATCACACTGTTTGGACT                        | -116       |
| <b>EMSAs (fragments)</b> |                                                             |            |
| <i>ptsH_upFor</i>        | GCTTCCCAGTGGGCGGGTACTC                                      | -249       |
| <i>ptsH_upRev</i>        | ATCGTCACCGGGACGCCTGTGG                                      | +103       |
| <i>actII-4_upFor</i>     | TCGGAAGCCTCGACCACTGC                                        | -134       |
| <i>actII-4_upRev</i>     | AGCAGCACCAGGAGCTGGGTTCG                                     | +97        |
| <i>redZ_upFor</i>        | TGCACGTGTCCTTCTGAGCGGAG                                     | -280       |
| <i>redZ_upRev</i>        | TGTCGTGCCGCTCCAGCAATGC                                      | +78        |

# Refers to the nt position of the 5' end of the oligonucleotide relative to the translational start site of the gene.
